# Supplementary material for: A simple definition of the number of excited electrons
Source: Royal Society of Chemistry journal article supplement (doi:10.1039/d5cp04176g), 2026-01-01
Supplement: d5cp04176g1.zip [file supporting_number_of_excited_states.pdf › supporting_number_of_excited_states.pdf]

# Supplementary Information

A Simple Definition of the Number of Excited Electrons

Cristian J. Guerra<sup>1</sup>

<sup>1</sup>Universidad Andrés Bello, Facultad de Ciencias Exactas, ,  
Departamento de Ciencias Químicas, Laboratorio de Síntesis y  
Reactividad de Compuestos Orgánicos, , República 275, Santiago  
8370146, Chile. , *Email*: c.guerramadera@uandresbello.edu

January 15, 2026

## Contents

|                                                                                                                               |    |
|-------------------------------------------------------------------------------------------------------------------------------|----|
| Two-dimensional representations of the additional molecular systems.                                                          | S3 |
| Number of excited electrons $\langle \hat{N}_{\text{ex}} \rangle$ at the Franck–Condon geometries for the additional systems. | S4 |
| Number of excited electrons $\langle \hat{N}_{\text{ex}} \rangle$ at the minimum geometries for the additional systems.       | S5 |
| Evolution of $\langle \hat{N}_{\text{ex}} \rangle$ during the dissociation of CO, N <sub>2</sub> , and HF.                    | S6 |
| Example of execution of the $\langle \hat{N}_{\text{ex}} \rangle$ analysis script                                             | S7 |
| Script execution . . . . .                                                                                                    | S7 |
| Description of the procedure . . . . .                                                                                        | S7 |
| Example output . . . . .                                                                                                      | S7 |



Two-dimensional representations of the additional molecular systems.

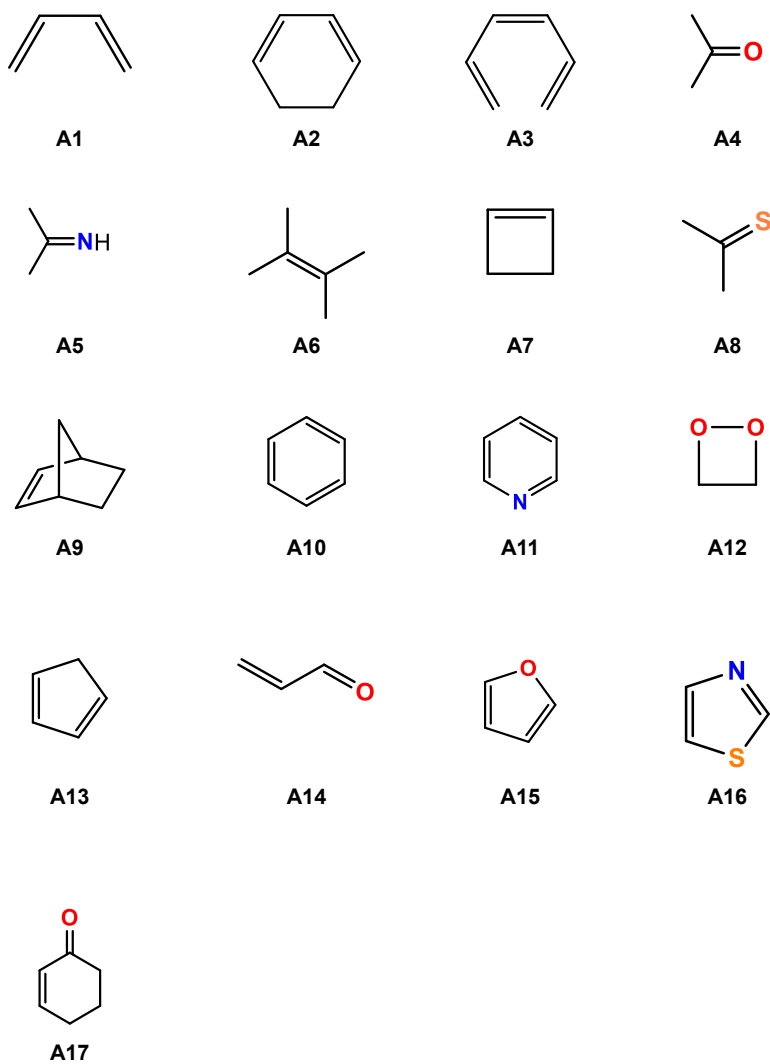

Figure S1: Two-dimensional representations of the additional molecular systems considered in this study.

## Number of excited electrons $\langle \hat{N}_{\text{ex}} \rangle$ at the Franck–Condon geometries for the additional systems.

Table S1: Number of excited electrons  $\langle \hat{N}_{\text{ex}} \rangle$  at the Franck–Condon geometries for the additional systems.

| System | $S_1$ | $S_2$ | Active Space |
|--------|-------|-------|--------------|
| A1     | 1.551 | 1.059 | CAS(4,4)     |
| A2     | 1.523 | 1.062 | CAS(4,4)     |
| A3     | 1.602 | 1.549 | CAS(6,6)     |
| A4     | 1.039 | 1.191 | CAS(6,5)     |
| A5     | 1.049 | 0.869 | CAS(6,5)     |
| A6     | 0.997 | 0.993 | CAS(2,2)     |
| A7     | 0.999 | 1.000 | CAS(4,4)     |
| A8     | 1.065 | 0.833 | CAS(6,6)     |
| A9     | 0.996 | 0.998 | CAS(4,4)     |
| A10    | 1.195 | 0.998 | CAS(6,6)     |
| A11    | 1.175 | 1.147 | CAS(10,9)    |
| A12    | 1.056 | 1.160 | CAS(12,10)   |
| A13    | 1.476 | 1.046 | CAS(4,4)     |
| A14    | 1.100 | 1.566 | CAS(8,8)     |
| A15    | 1.203 | 1.015 | CAS(10,9)    |
| A16    | 1.027 | 1.012 | CAS(8,7)     |
| A17    | 1.097 | 1.598 | CAS(8,8)     |

## Number of excited electrons $\langle \hat{N}_{\text{ex}} \rangle$ at the minimum geometries for the additional systems.

Table S2: Number of excited electrons  $\langle \hat{N}_{\text{ex}} \rangle$  at the minimum geometries for the additional systems.

| System | $S_1$ | $S_2$ | Active Space |
|--------|-------|-------|--------------|
| A1     | 1.577 | 1.047 | CAS(4,4)     |
| A2     | 1.563 | 1.029 | CAS(4,4)     |
| A3     | 1.635 | 1.650 | CAS(6,6)     |
| A4     | 1.047 | 1.040 | CAS(6,5)     |
| A5     | 1.049 | 1.057 | CAS(6,5)     |
| A6     | 1.004 | 1.000 | CAS(2,2)     |
| A7     | 0.998 | 1.013 | CAS(4,4)     |
| A8     | 1.075 | 0.736 | CAS(6,6)     |
| A9     | 0.996 | 1.012 | CAS(4,4)     |
| A10    | 1.216 | 1.017 | CAS(6,6)     |
| A11    | 1.182 | 1.176 | CAS(10,9)    |
| A12    | 1.440 | 1.421 | CAS(12,10)   |
| A13    | 1.527 | 1.036 | CAS(4,4)     |
| A14    | 1.118 | 1.521 | CAS(8,8)     |
| A15    | 1.244 | 1.037 | CAS(10,9)    |
| A16    | 1.026 | 1.017 | CAS(8,7)     |
| A17    | 1.119 | 1.527 | CAS(8,8)     |

# Evolution of $\langle \hat{N}_{\text{ex}} \rangle$ during the dissociation of CO, N<sub>2</sub>, and HF.

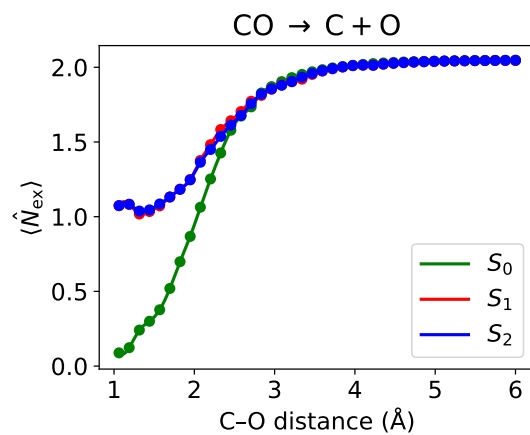

Figure S2: Evolution of  $\langle \hat{N}_{\text{ex}} \rangle$  during the dissociation of CO in states  $S_0$ ,  $S_1$ , and  $S_2$  calculated at CAS(8,8)/aug-cc-PVQZ level.

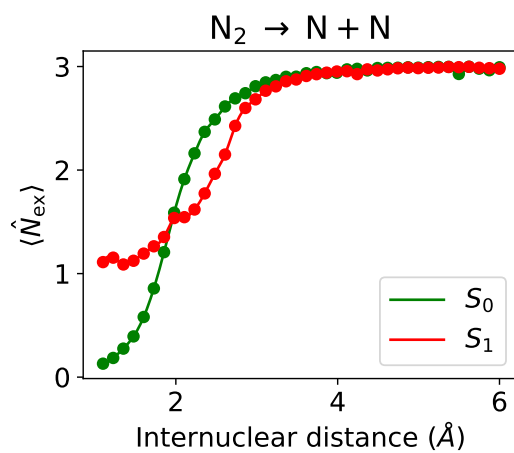

Figure S3: Evolution of  $\langle \hat{N}_{\text{ex}} \rangle$  during the dissociation of N<sub>2</sub> in states  $S_0$ ,  $S_1$ , and  $S_2$  calculated at CAS(10,8)/aug-cc-PVQZ level.

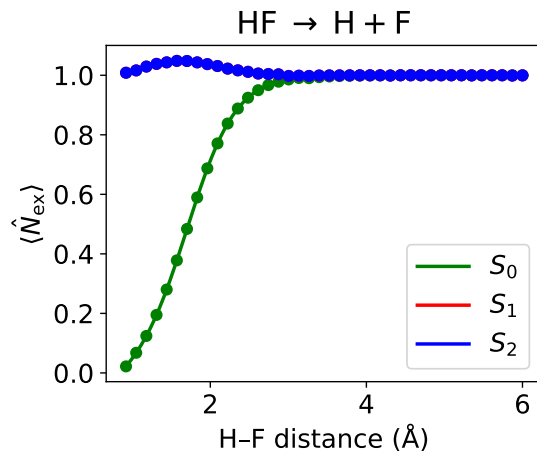

Figure S4: Evolution of  $\langle \hat{N}_{\text{ex}} \rangle$  during the dissociation of HF in states  $S_0$ ,  $S_1$ , and  $S_2$  calculated at CAS(6,4)/aug-cc-PVQZ level.

## Example of execution of the $\langle \hat{N}_{\text{ex}} \rangle$ analysis script

### Script execution

The Python script `Nex_normalized.py` was used to compute the number of excited electrons  $\langle \hat{N}_{\text{ex}} \rangle$  from configuration–interaction (CI) expansions. The script is executed from the command line by providing a CI configuration file as input:

```
python Nex_normalized.py input.conf
```

For the example discussed here, the following command was used:

```
python Nex_normalized.py A1_cas_s2.conf
```

### Description of the procedure

The script parses the CI expansions for each electronic root contained in the input file. The reference configuration is automatically selected as the configuration with the largest squared CI coefficient ( $c^2$ ) in ROOT 0. For each root, the printed CI coefficients are explicitly normalized, and the total number of excited electrons  $\langle \hat{N}_{\text{ex}} \rangle$  is computed. Additionally,  $\langle \hat{N}_{\text{ex}} \rangle$  is decomposed into fractional contributions  $f_{\text{ex}}^{(k)}$  associated with excitation order  $k$ .

### Example output

A representative output obtained from the execution above is reported below:

Reference configuration (ROOT 0, largest c2): 2200

=====

ROOT 0: N\_ex = 0.179612

Printed CI weight before normalization: 0.998040

-----

k = 0: f\_ex^(0) = 0.000000 (0.00%), count = 1  
k = 1: f\_ex^(1) = 0.112574 (11.26%), count = 1  
k = 2: f\_ex^(2) = 0.887426 (88.74%), count = 5  
Total sum of fractions: 1.000000000000  
The sum of fractions is correct ( 1.0)

ROOT 1: N\_ex = 1.593526

Printed CI weight before normalization: 0.999670

-----

k = 1: f\_ex^(1) = 0.259868 (25.99%), count = 2  
k = 2: f\_ex^(2) = 0.725763 (72.58%), count = 5  
k = 3: f\_ex^(3) = 0.014369 (1.44%), count = 2  
Total sum of fractions: 1.000000000000  
The sum of fractions is correct ( 1.0)

ROOT 2: N\_ex = 1.061621

Printed CI weight before normalization: 0.997870

-----

k = 1: f\_ex^(1) = 0.887489 (88.75%), count = 2  
k = 2: f\_ex^(2) = 0.101778 (10.18%), count = 2  
k = 3: f\_ex^(3) = 0.010733 (1.07%), count = 1  
Total sum of fractions: 1.000000000000  
The sum of fractions is correct ( 1.0)

ROOT 3: N\_ex = 1.205492

Printed CI weight before normalization: 0.999360

-----

k = 0: f\_ex^(0) = 0.000000 (0.00%), count = 1  
k = 1: f\_ex^(1) = 0.627299 (62.73%), count = 2  
k = 2: f\_ex^(2) = 0.270503 (27.05%), count = 5  
k = 3: f\_ex^(3) = 0.102198 (10.22%), count = 2  
Total sum of fractions: 1.000000000000  
The sum of fractions is correct ( 1.0)
